# Supplementary material for: A simple and predictive phenotypic High Content Imaging assay for Plasmodium falciparum mature gametocytes to identify malaria transmission blocking compounds
Source: PubMed Central journal article supplement (PMC4639769; doi:10.1038/srep16414), 2015-11-10
Supplement: srep16414-s1.pdf [file srep16414-s1.pdf]

# A simple and predictive phenotypic High Content Imaging assay for Plasmodium falciparum mature gametocytes to identify malaria transmission blocking compounds

Leonardo Lucantoni, Francesco Silvestrini, Michele Signore, Giulia Siciliano, Maarten Eldering, Koen J Dechering, Vicky M Avery, Pietro Alano

## Supplementary Figure S1

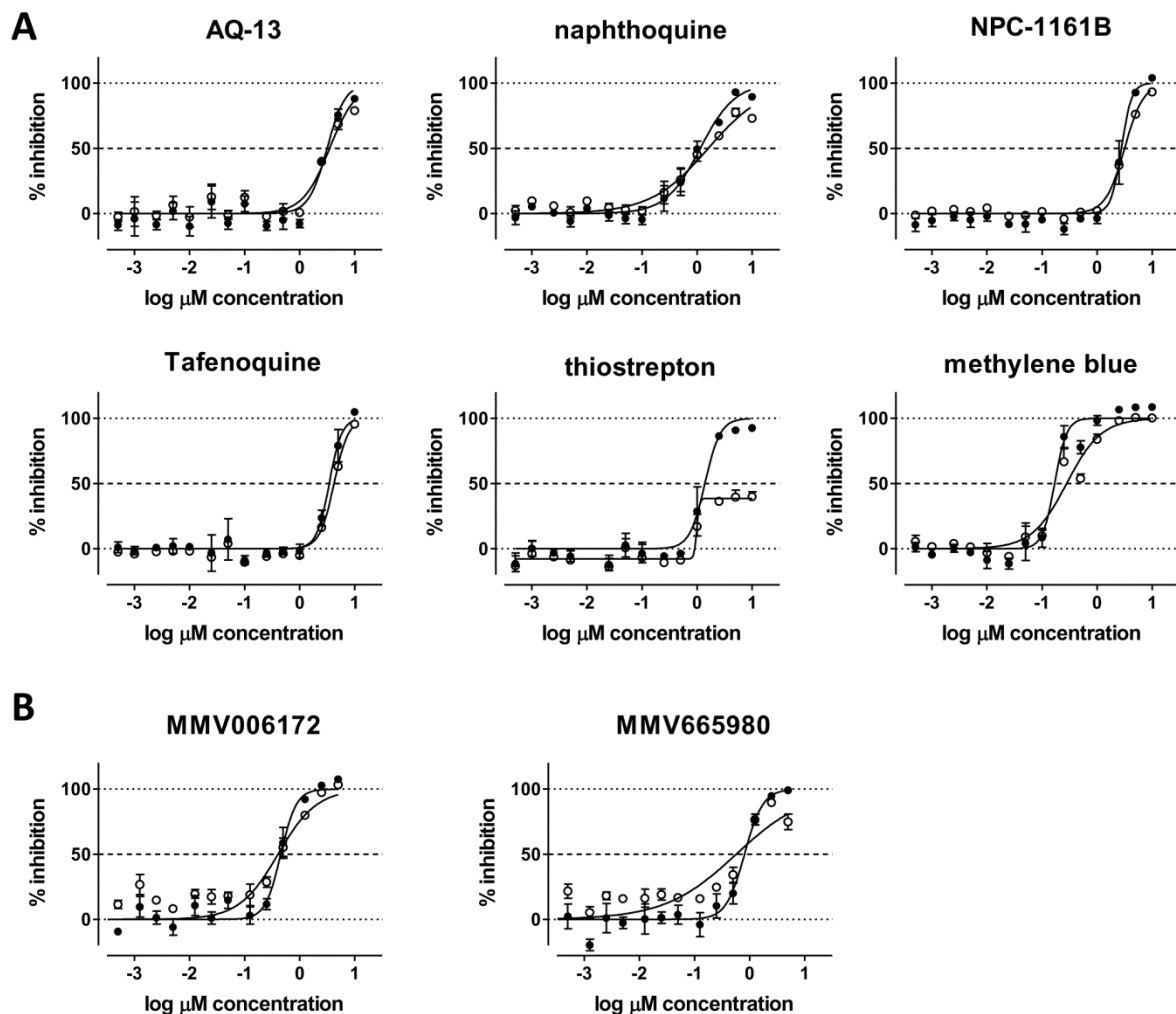

**Supplementary Figure S1.** Activity of reference antimalarial compounds (A) and hits from the MMV Malaria Box (B) on female gamete formation (filled circles) and total sexual forms numbers (hollow circles). Data are average values and error bars represent SEM ( $n=3$ ).

## Supplementary Table S1

Activity of a panel of antimalarial drugs and compounds on gametes, total sexual forms and rounding up efficiency

| class             | compound             | gamete formation            |               |        | total sexual forms    |       |               |        | proportion of rounding-up |       |                 |       |      |
|-------------------|----------------------|-----------------------------|---------------|--------|-----------------------|-------|---------------|--------|---------------------------|-------|-----------------|-------|------|
|                   |                      | IC <sub>50</sub> (µM) ± SEM | % inhibition† | ± SEM  | IC <sub>50</sub> (µM) | ± SEM | % inhibition† | ± SEM  | EC <sub>50</sub> (µM)     | ± SEM | % DMSO control† | ± SEM |      |
| 4-aminoquinolines | amodiaquine          |                             | 62,13         | 4,40   |                       |       | 53,58         | 5,88   |                           |       | 87,03           | 3,69  |      |
| 4-aminoquinolines | AQ-13                | 3,15                        | 0,65          | 88,09  | 2,59                  | 3,50  | 0,38 *        | 78,91  | 2,52                      |       | 83,77           | 1,18  |      |
| 4-aminoquinolines | chloroquine          |                             | 63,72         | 3,78   |                       |       | 58,03         | 3,31   |                           |       | 92,01           | 1,03  |      |
| 4-aminoquinolines | hydroxychloroquine   |                             | 60,62         | 5,12   |                       |       | 55,37         | 3,92   |                           |       | 92,56           | 2,85  |      |
| 4-aminoquinolines | naphthoquine         | 1,14                        | 0,23          | 89,47  | 0,12                  | 1,60  | 0,22 *        | 73,02  | 2,19                      |       | 60,12           | 3,66  |      |
| 4-aminoquinolines | piperazine           |                             | 16,73         | 2,19   |                       |       | 10,17         | 5,88   |                           |       | 96,22           | 0,98  |      |
| 8-aminoquinoline  | diethylprimaquine    |                             | 20,96         | 6,12   |                       |       | 14,37         | 0,57   |                           |       | 95,32           | 3,01  |      |
| 8-aminoquinoline  | NPC-1161B            | 2,76                        | 0,34          | 104,02 | 0,93                  | 3,15  | 0,18 *        | 93,09  | 1,02                      |       | 60,28           | 5,55  |      |
| 8-aminoquinoline  | primaquine           |                             | 53,31         | 2,92   |                       |       | 27,69         | 4,24   |                           |       | 69,46           | 3,05  |      |
| 8-aminoquinoline  | tafenoquine          | 3,45                        | 0,55          | 104,77 | 0,58                  | 4,22  | 0,38 *        | 95,42  | 0,37                      |       | 71,54           | 9,15  |      |
| aminoalcohols     | halofantrine         |                             | 38,11         | 21,07  |                       |       | 34,01         | 17,10  |                           |       | 89,50           | 5,87  |      |
| aminoalcohols     | lumefantrine         |                             | -4,82         | 1,74   |                       |       | 0,82          | 1,07   |                           |       | 99,06           | 0,52  |      |
| aminoalcohols     | mefloquine (+ RS)    | 4,75                        | 0,67 *        | 86,10  | 2,42                  |       |               | 64,35  | 3,66                      |       | 52,30           | 2,52  |      |
| aminoalcohols     | mefloquine (Racemic) | 5,11                        | 1,18 *        | 82,39  | 2,24                  |       |               | 58,49  | 1,04                      |       | 52,19           | 5,68  |      |
| aminoalcohols     | quinine              |                             | 1,74          | 5,03   |                       |       | 5,54          | 3,56   |                           |       | 98,76           | 0,58  |      |
| anilinoacridine   | pyronaridine         | 3,32                        | 0,41 *        | 106,85 | 0,42                  | 3,96  | 0,34 *        | 93,40  | 2,58                      |       | 23,87           | 3,79  |      |
| antibiotics       | azithromycin         |                             | 16,75         | 7,83   |                       |       | 19,19         | 5,39   |                           |       | 98,24           | 2,34  |      |
| antibiotics       | clindamycin          |                             | 3,65          | 6,95   |                       |       | 8,13          | 5,87   |                           |       | 99,75           | 0,82  |      |
| antibiotics       | doxycyclin           |                             | -2,33         | 7,82   |                       |       | 3,51          | 6,46   |                           |       | 99,68           | 0,95  |      |
| antibiotics       | fosmidomycin         |                             | -3,83         | 3,73   |                       |       | -5,75         | 8,28   |                           |       | 100,63          | 0,60  |      |
| antibiotics       | tetracycline         |                             | -3,62         | 3,85   |                       |       | 0,82          | 3,07   |                           |       | 99,00           | 0,59  |      |
| antibiotics       | thiostrepton         | 1,39                        | 0,31          | 92,58  | 1,93                  |       |               | 39,98  | 3,62                      | 1,97  | 0,16 *          | 18,55 | 1,93 |
| antifolates       | chlorproguanil       | 3,08                        | 0,42 *        | 99,56  | 2,67                  | 4,16  | 0,44 *        | 87,82  | 3,97                      |       | 63,25           | 0,21  |      |
| antifolates       | dapsone              |                             | -4,72         | 3,30   |                       |       | 1,46          | 3,10   |                           |       | 99,71           | 0,48  |      |
| antifolates       | proguanil            |                             | 50,93         | 7,71   |                       |       | 44,13         | 5,73   |                           |       | 87,23           | 3,68  |      |
| antifolates       | pyrimethamine        |                             | 7,72          | 6,63   |                       |       | 5,51          | 5,75   |                           |       | 100,33          | 0,50  |      |
| antifolates       | trimethoprim         |                             | 14,51         | 3,48   |                       |       | 12,03         | 2,24   |                           |       | 101,07          | 0,45  |      |
| diamidines        | pentamidine          |                             | 68,34         | 3,44   |                       |       | 55,52         | 2,47   |                           |       | 98,27           | 0,70  |      |
| endoperoxides     | artemether           |                             | 44,26         | 7,09   |                       |       | 38,73         | 5,54   |                           |       | 99,84           | 0,45  |      |
| endoperoxides     | artemisinin          |                             | 35,40         | 11,73  |                       |       | 32,35         | 10,02  |                           |       | 100,47          | 1,25  |      |
| endoperoxides     | artemisono           |                             | 61,65         | 3,28   |                       |       | 27,22         | 1,64   |                           |       | 75,03           | 2,76  |      |
| endoperoxides     | artesunate           |                             | 62,97         | 9,48   |                       |       | 49,67         | 8,42   |                           |       | 90,27           | 2,05  |      |
| endoperoxides     | dihydroartemisinin   |                             | 64,32         | 4,79   |                       |       | 53,68         | 3,70   |                           |       | 93,17           | 1,53  |      |
| naphthoquinones   | atovaquone           |                             | 54,82         | 1,13   |                       |       | 25,91         | 3,95   |                           |       | 56,86           | 1,63  |      |
| others            | cycloheximide        |                             | 62,10         | 4,32   |                       |       | 17,36         | 4,34   |                           |       | 48,58           | 3,15  |      |
| others            | methylene blue       | 0,17                        | 0,04          | 108,60 | 0,20                  | 0,28  | 0,04          | 100,24 | 0,20                      | 0,91  | 0,18 *          | 76,40 | 3,78 |
| sulfonamides      | sulfadiazine         |                             | 1,29          | 7,52   |                       |       | 0,03          | 7,11   |                           |       | 81,65           | 2,22  |      |
| sulfonamides      | sulfadoxine          |                             | -1,85         | 1,72   |                       |       | 1,65          | 2,54   |                           |       | 65,65           | 1,37  |      |
| sulfonamides      | sulfamethoxazole     |                             | -4,20         | 3,38   |                       |       | -6,58         | 6,01   |                           |       | 16,56           | 2,82  |      |

† activity at 10 µM shown

\* IC<sub>50</sub> value to be considered as approximate (maximal inhibition plateau not reached)

## Supplementary Table S2

Activity of the MMV Malaria Box compounds on gametes, total sexual forms and rounding up efficiency. Compounds were screened at 5  $\mu$ M. Averages of two independent screening replicates  $\pm$  standard deviation.

| ID        | Set        | gamete formaton inhibition | $\pm$ SD | total sexual forms inhibition | $\pm$ SD | % rounding up inhibition | $\pm$ SD | comments        |
|-----------|------------|----------------------------|----------|-------------------------------|----------|--------------------------|----------|-----------------|
| MMV000448 | Probe-like | 96,84%                     | 3,52%    | 79,88%                        | 5,15%    | 55,40%                   | 6,21%    | confirmed hit   |
| MMV000662 | Drug-like  | 68,50%                     | 26,08%   | 63,55%                        | 20,64%   | 15,64%                   | 7,34%    | confirmed hit   |
| MMV000787 | Probe-like | 66,29%                     | 29,66%   | 42,00%                        | 3,93%    | 45,58%                   | 37,46%   | confirmed hit   |
| MMV000788 | Drug-like  | 107,68%                    | 1,29%    | 97,22%                        | 2,88%    | 45,11%                   | 13,44%   | confirmed hit   |
| MMV000963 | Drug-like  | 60,38%                     | 39,10%   | 58,56%                        | 31,05%   | 11,08%                   | 6,94%    | confirmed hit   |
| MMV006169 | Probe-like | 63,94%                     | 21,92%   | 60,51%                        | 18,47%   | 5,72%                    | 7,48%    | confirmed hit   |
| MMV006172 | Probe-like | 105,61%                    | 3,19%    | 88,95%                        | 3,06%    | 74,51%                   | 17,30%   | confirmed hit   |
| MMV006429 | Drug-like  | 77,76%                     | 6,42%    | 67,29%                        | 2,63%    | 26,19%                   | 7,95%    | confirmed hit   |
| MMV007591 | Probe-like | 94,61%                     | 3,74%    | 75,36%                        | 13,87%   | 53,45%                   | 11,92%   | confirmed hit   |
| MMV007907 | Drug-like  | 77,12%                     | 4,48%    | 48,15%                        | 3,43%    | 53,66%                   | 9,54%    | confirmed hit   |
| MMV019555 | Probe-like | 60,74%                     | 12,90%   | 46,02%                        | 9,95%    | 27,65%                   | 4,56%    | confirmed hit   |
| MMV019690 | Probe-like | 57,40%                     | 25,89%   | 52,62%                        | 18,50%   | 13,25%                   | 10,73%   | confirmed hit   |
| MMV019918 | Drug-like  | 97,92%                     | 9,66%    | 84,14%                        | 10,93%   | 48,28%                   | 9,01%    | confirmed hit   |
| MMV306025 | Drug-like  | 83,36%                     | 18,21%   | 77,31%                        | 15,74%   | 14,31%                   | 2,75%    | confirmed hit   |
| MMV396749 | Drug-like  | 69,66%                     | 13,28%   | 62,70%                        | 7,96%    | 18,76%                   | 9,15%    | confirmed hit   |
| MMV396794 | Drug-like  | 53,37%                     | 6,23%    | 46,07%                        | 6,29%    | 13,88%                   | 3,68%    | confirmed hit   |
| MMV396797 | Drug-like  | 88,14%                     | 7,95%    | 51,91%                        | 3,64%    | 69,41%                   | 10,16%   | confirmed hit   |
| MMV665830 | Probe-like | 70,34%                     | 8,82%    | 65,21%                        | 3,74%    | 13,69%                   | 8,95%    | confirmed hit   |
| MMV665878 | Drug-like  | 77,09%                     | 7,80%    | 67,83%                        | 3,21%    | 23,46%                   | 9,86%    | confirmed hit   |
| MMV665941 | Probe-like | 91,55%                     | 12,77%   | 76,05%                        | 18,02%   | 43,03%                   | 3,52%    | confirmed hit   |
| MMV665969 | Probe-like | 60,91%                     | 2,75%    | 47,41%                        | 3,17%    | 24,83%                   | 2,95%    | confirmed hit   |
| MMV665980 | Probe-like | 102,03%                    | 3,86%    | 85,97%                        | 4,16%    | 60,30%                   | 7,73%    | confirmed hit   |
| MMV666597 | Probe-like | 91,97%                     | 6,92%    | 85,62%                        | 6,49%    | 10,27%                   | 3,04%    | confirmed hit   |
| MMV667491 | Probe-like | 78,82%                     | 6,43%    | 66,85%                        | 5,22%    | 27,91%                   | 4,56%    | confirmed hit   |
| MMV000248 | Drug-like  | 49,41%                     | 21,77%   | 46,11%                        | 14,51%   | 14,06%                   | 7,18%    |                 |
| MMV000304 | Probe-like | 44,56%                     | 0,29%    | 44,10%                        | 1,22%    | 8,65%                    | 0,97%    |                 |
| MMV000326 | Probe-like | 11,22%                     | 0,06%    | 15,70%                        | 3,31%    | 0,64%                    | 1,87%    |                 |
| MMV000340 | Probe-like | 28,51%                     | 19,64%   | 33,98%                        | 15,35%   | 2,85%                    | 4,47%    |                 |
| MMV000356 | Drug-like  | 3,61%                      | 8,57%    | 10,03%                        | 14,11%   | -1,19%                   | 1,63%    |                 |
| MMV000442 | Probe-like | -3,36%                     | 21,65%   | 8,76%                         | 18,01%   | 1,15%                    | 2,78%    |                 |
| MMV000443 | Probe-like | 15,50%                     | 2,71%    | 24,03%                        | 0,40%    | 1,58%                    | 0,45%    |                 |
| MMV000444 | Probe-like | 14,50%                     | 1,03%    | 16,75%                        | 1,22%    | 2,97%                    | 5,36%    |                 |
| MMV000445 | Probe-like | 45,44%                     | 28,03%   | 43,41%                        | 19,34%   | 13,03%                   | 7,96%    |                 |
| MMV000478 | Probe-like | 21,02%                     | 2,78%    | 26,35%                        | 0,21%    | 4,73%                    | 0,66%    |                 |
| MMV000483 | Drug-like  | 45,66%                     | 89,01%   | 46,98%                        | 73,57%   | 20,50%                   | 26,94%   |                 |
| MMV000498 | Drug-like  | 3,07%                      | 2,49%    | 12,77%                        | 4,94%    | 2,69%                    | 0,41%    |                 |
| MMV000561 | Drug-like  | 50,81%                     | 46,14%   | 52,49%                        | 36,84%   | 4,29%                    | 7,24%    | autofluorescent |
| MMV000563 | Drug-like  | 7,16%                      | 9,74%    | 8,78%                         | 8,31%    | 4,30%                    | 6,60%    |                 |
| MMV000570 | Probe-like | 14,50%                     | 9,47%    | 19,36%                        | 10,05%   | -0,55%                   | 3,62%    |                 |

| ID        | Set        | gamete<br>formaton<br>inhibition | ± SD   | total<br>sexual<br>forms<br>inhibition | ± SD   | %<br>rounding<br>up<br>inhibition | ± SD   | comments                               |
|-----------|------------|----------------------------------|--------|----------------------------------------|--------|-----------------------------------|--------|----------------------------------------|
| MMV000604 | Probe-like | 0,72%                            | 9,68%  | 13,18%                                 | 10,36% | -0,22%                            | 0,00%  |                                        |
| MMV000617 | Probe-like | -10,05%                          | 18,98% | 2,69%                                  | 18,13% | 1,60%                             | 0,38%  |                                        |
| MMV000619 | Probe-like | 27,55%                           | 17,42% | 34,39%                                 | 11,52% | 1,34%                             | 1,52%  |                                        |
| MMV000621 | Probe-like | 28,31%                           | 17,22% | 32,08%                                 | 11,26% | 5,87%                             | 2,34%  |                                        |
| MMV000634 | Drug-like  | 13,82%                           | 12,97% | 23,55%                                 | 6,43%  | 0,63%                             | 2,72%  |                                        |
| MMV000642 | Probe-like | 43,94%                           | 4,76%  | 42,65%                                 | 1,84%  | 10,28%                            | 1,39%  |                                        |
| MMV000648 | Drug-like  | 39,04%                           | 27,23% | 40,52%                                 | 21,08% | 7,42%                             | 1,63%  |                                        |
| MMV000653 | Drug-like  | 25,06%                           | 28,61% | 29,80%                                 | 19,50% | 5,74%                             | 4,29%  |                                        |
| MMV000699 | Probe-like | -1,33%                           | 6,13%  | 8,23%                                  | 5,88%  | 3,70%                             | 2,15%  |                                        |
| MMV000704 | Probe-like | -2,70%                           | 27,41% | 9,48%                                  | 23,54% | 0,83%                             | 1,78%  |                                        |
| MMV000720 | Probe-like | 22,05%                           | 18,41% | 26,77%                                 | 9,40%  | 5,98%                             | 5,90%  |                                        |
| MMV000753 | Probe-like | 6,38%                            | 20,39% | 8,58%                                  | 19,53% | 3,50%                             | 4,93%  |                                        |
| MMV000760 | Drug-like  | 69,04%                           | 15,66% | 38,84%                                 | 3,77%  | 49,19%                            | 17,67% | unconfirmed hit                        |
| MMV000839 | Drug-like  | 1,92%                            | 4,38%  | 13,74%                                 | 8,32%  | 0,23%                             | 2,79%  |                                        |
| MMV000848 | Drug-like  | 25,93%                           | 19,27% | 33,82%                                 | 12,65% | 0,23%                             | 1,84%  |                                        |
| MMV000911 | Drug-like  | 4,71%                            | 2,54%  | 8,57%                                  | 0,07%  | 2,23%                             | 3,34%  |                                        |
| MMV000917 | Probe-like | 16,20%                           | 12,30% | 20,15%                                 | 12,86% | 7,15%                             | 0,12%  |                                        |
| MMV000972 | Drug-like  | 47,34%                           | 79,97% | 46,02%                                 | 70,77% | 5,68%                             | 11,28% |                                        |
| MMV000986 | Probe-like | 20,50%                           | 0,23%  | 26,61%                                 | 1,08%  | 3,73%                             | 1,12%  |                                        |
| MMV001038 | Drug-like  | 27,43%                           | 0,80%  | 32,73%                                 | 3,54%  | 3,22%                             | 1,47%  |                                        |
| MMV001041 | Probe-like | 24,94%                           | 14,37% | 30,33%                                 | 11,70% | 3,74%                             | 3,44%  |                                        |
| MMV001049 | Drug-like  | -3,18%                           | 1,54%  | 10,43%                                 | 3,47%  | -0,60%                            | 0,43%  |                                        |
| MMV001230 | Drug-like  | -11,89%                          | 14,63% | 2,18%                                  | 13,73% | 0,61%                             | 1,15%  |                                        |
| MMV001239 | Probe-like | -3,78%                           | 5,73%  | 8,12%                                  | 9,57%  | 1,34%                             | 2,52%  |                                        |
| MMV001241 | Probe-like | -9,20%                           | 1,79%  | 5,57%                                  | 6,47%  | -0,70%                            | 2,59%  |                                        |
| MMV001246 | Drug-like  | 46,71%                           | 1,71%  | 32,09%                                 | 11,68% | 27,34%                            | 13,61% |                                        |
| MMV001255 | Drug-like  | 12,99%                           | 27,18% | 17,60%                                 | 19,66% | 1,40%                             | 0,07%  |                                        |
| MMV001318 | Drug-like  | -7,94%                           | 9,04%  | 2,50%                                  | 11,33% | 3,72%                             | 0,96%  |                                        |
| MMV001344 | Drug-like  | 19,12%                           | 8,85%  | 19,16%                                 | 7,75%  | 5,10%                             | 6,07%  |                                        |
| MMV006087 | Drug-like  | 4,46%                            | 4,72%  | 10,92%                                 | 0,91%  | -0,68%                            | 0,12%  |                                        |
| MMV006188 | Drug-like  | 23,75%                           | 9,62%  | 29,23%                                 | 8,30%  | 3,83%                             | 2,57%  |                                        |
| MMV006203 | Probe-like | 84,54%                           | 27,17% | 75,41%                                 | 30,44% | 28,88%                            | 6,77%  | artifact / increased spot fluorescence |
| MMV006250 | Probe-like | 7,06%                            | 14,38% | 10,40%                                 | 16,36% | 2,03%                             | 2,05%  |                                        |
| MMV006278 | Drug-like  | 9,87%                            | 23,06% | 18,70%                                 | 20,02% | 2,25%                             | 1,84%  |                                        |
| MMV006303 | Probe-like | 3,89%                            | 10,67% | 9,71%                                  | 4,53%  | 0,39%                             | 0,37%  |                                        |
| MMV006309 | Probe-like | 12,42%                           | 16,60% | 21,79%                                 | 13,18% | 1,14%                             | 3,60%  |                                        |
| MMV006319 | Drug-like  | 96,19%                           | 19,61% | 89,93%                                 | 16,22% | 18,07%                            | 20,05% | unconfirmed hit                        |
| MMV006389 | Probe-like | 26,01%                           | 18,22% | 26,31%                                 | 14,74% | 4,11%                             | 8,03%  |                                        |
| MMV006427 | Drug-like  | 47,01%                           | 13,99% | 44,19%                                 | 10,37% | 12,64%                            | 1,56%  |                                        |
| MMV006455 | Drug-like  | 23,50%                           | 20,36% | 23,62%                                 | 17,16% | 4,56%                             | 7,53%  |                                        |
| MMV006457 | Probe-like | 16,98%                           | 26,76% | 20,73%                                 | 28,79% | -0,74%                            | 1,22%  |                                        |
| MMV006513 | Probe-like | 44,99%                           | 3,92%  | 45,01%                                 | 2,01%  | 7,81%                             | 0,15%  |                                        |
| MMV006522 | Probe-like | 7,42%                            | 3,29%  | 11,46%                                 | 2,14%  | 1,73%                             | 0,01%  |                                        |
| MMV006545 | Drug-like  | 29,47%                           | 20,40% | 33,64%                                 | 15,41% | 4,90%                             | 0,12%  |                                        |

| ID        | Set        | gamete<br>formaton<br>inhibition | ± SD   | total<br>sexual<br>forms<br>inhibition | ± SD   | %<br>rounding<br>up<br>inhibition | ± SD   | comments        |
|-----------|------------|----------------------------------|--------|----------------------------------------|--------|-----------------------------------|--------|-----------------|
| MMV006558 | Probe-like | 14,84%                           | 11,80% | 17,58%                                 | 9,40%  | 2,22%                             | 7,30%  |                 |
| MMV006587 | Drug-like  | -0,05%                           | 3,56%  | 12,05%                                 | 5,42%  | 0,47%                             | 0,02%  |                 |
| MMV006656 | Probe-like | 8,23%                            | 9,49%  | 11,20%                                 | 5,84%  | 3,07%                             | 2,67%  |                 |
| MMV006704 | Drug-like  | -0,69%                           | 13,47% | 4,79%                                  | 7,91%  | 1,39%                             | 1,62%  |                 |
| MMV006706 | Drug-like  | -14,16%                          | 11,64% | 0,95%                                  | 12,48% | -0,09%                            | 0,16%  |                 |
| MMV006753 | Probe-like | 21,95%                           | 15,24% | 23,19%                                 | 13,59% | 3,20%                             | 5,87%  |                 |
| MMV006764 | Probe-like | 24,08%                           | 6,32%  | 22,08%                                 | 7,21%  | 7,24%                             | 3,74%  |                 |
| MMV006767 | Drug-like  | -3,09%                           | 8,89%  | 9,60%                                  | 10,66% | 0,30%                             | 0,94%  |                 |
| MMV006787 | Probe-like | 23,40%                           | 8,04%  | 28,60%                                 | 10,08% | 4,09%                             | 1,82%  |                 |
| MMV006820 | Drug-like  | 23,08%                           | 22,20% | 29,36%                                 | 13,77% | 3,67%                             | 4,16%  |                 |
| MMV006825 | Probe-like | 24,34%                           | 3,04%  | 24,17%                                 | 2,12%  | 5,11%                             | 4,39%  |                 |
| MMV006861 | Probe-like | 22,57%                           | 6,21%  | 20,88%                                 | 4,73%  | 7,02%                             | 6,72%  |                 |
| MMV006882 | Probe-like | -1,50%                           | 4,16%  | 5,12%                                  | 1,57%  | -0,08%                            | 0,42%  |                 |
| MMV006913 | Drug-like  | 57,39%                           | 67,26% | 57,62%                                 | 54,81% | 10,66%                            | 14,99% | unconfirmed hit |
| MMV006937 | Drug-like  | 2,25%                            | 11,06% | 10,34%                                 | 15,65% | -3,04%                            | 1,11%  |                 |
| MMV006962 | Probe-like | 2,16%                            | 21,58% | 8,08%                                  | 14,04% | 7,45%                             | 8,00%  |                 |
| MMV007020 | Probe-like | 16,24%                           | 8,63%  | 21,23%                                 | 9,21%  | 5,92%                             | 0,57%  |                 |
| MMV007041 | Probe-like | 11,01%                           | 9,77%  | 13,73%                                 | 3,05%  | 3,17%                             | 1,10%  |                 |
| MMV007092 | Probe-like | 12,13%                           | 1,55%  | 18,71%                                 | 7,31%  | 4,48%                             | 7,87%  |                 |
| MMV007113 | Probe-like | 39,88%                           | 3,92%  | 37,63%                                 | 3,58%  | 12,26%                            | 2,55%  |                 |
| MMV007116 | Drug-like  | 50,48%                           | 74,13% | 47,13%                                 | 63,63% | 18,00%                            | 27,92% | unconfirmed hit |
| MMV007127 | Probe-like | 0,08%                            | 11,62% | 12,82%                                 | 10,86% | -0,38%                            | 1,30%  |                 |
| MMV007160 | Probe-like | 14,93%                           | 0,72%  | 17,62%                                 | 2,77%  | 2,37%                             | 3,08%  |                 |
| MMV007181 | Probe-like | 17,25%                           | 1,52%  | 25,63%                                 | 4,05%  | 1,26%                             | 0,95%  |                 |
| MMV007199 | Probe-like | 8,39%                            | 10,00% | 12,13%                                 | 5,77%  | 2,20%                             | 2,10%  |                 |
| MMV007208 | Probe-like | 18,37%                           | 3,68%  | 24,30%                                 | 0,99%  | 4,46%                             | 2,61%  |                 |
| MMV007224 | Probe-like | 18,44%                           | 16,90% | 17,91%                                 | 9,57%  | 6,78%                             | 2,14%  |                 |
| MMV007228 | Probe-like | 2,85%                            | 0,20%  | 8,13%                                  | 4,27%  | 0,76%                             | 1,05%  |                 |
| MMV007273 | Probe-like | 0,01%                            | 10,43% | 12,48%                                 | 12,05% | -0,17%                            | 1,29%  |                 |
| MMV007275 | Probe-like | 1,06%                            | 1,88%  | 10,13%                                 | 0,37%  | 3,88%                             | 0,72%  |                 |
| MMV007285 | Probe-like | -6,91%                           | 4,10%  | -1,02%                                 | 3,07%  | 1,28%                             | 5,68%  |                 |
| MMV007363 | Drug-like  | 2,10%                            | 10,32% | 13,83%                                 | 12,79% | 0,17%                             | 2,35%  |                 |
| MMV007374 | Drug-like  | 7,39%                            | 0,51%  | 16,81%                                 | 0,11%  | 2,20%                             | 3,37%  |                 |
| MMV007384 | Probe-like | 41,79%                           | 15,02% | 40,82%                                 | 14,11% | 3,81%                             | 4,01%  |                 |
| MMV007396 | Probe-like | 14,30%                           | 20,13% | 22,78%                                 | 17,08% | 1,79%                             | 2,37%  |                 |
| MMV007430 | Drug-like  | 15,52%                           | 10,00% | 16,29%                                 | 11,62% | 4,37%                             | 2,75%  |                 |
| MMV007474 | Probe-like | 12,92%                           | 8,34%  | 14,75%                                 | 8,82%  | 3,47%                             | 4,32%  |                 |
| MMV007557 | Probe-like | 6,09%                            | 2,54%  | 9,50%                                  | 2,33%  | 2,48%                             | 5,92%  |                 |
| MMV007564 | Drug-like  | -6,53%                           | 10,54% | 1,35%                                  | 0,65%  | -0,59%                            | 2,89%  |                 |
| MMV007571 | Drug-like  | -10,04%                          | 17,68% | 3,03%                                  | 16,42% | 1,31%                             | 1,01%  |                 |
| MMV007574 | Probe-like | -2,14%                           | 15,28% | 11,53%                                 | 13,39% | -0,99%                            | 1,78%  |                 |
| MMV007577 | Probe-like | 14,50%                           | 15,73% | 23,36%                                 | 9,87%  | 1,66%                             | 1,25%  |                 |
| MMV007617 | Drug-like  | -0,06%                           | 13,62% | 9,65%                                  | 13,24% | 3,19%                             | 0,88%  |                 |
| MMV007654 | Probe-like | 17,29%                           | 16,59% | 26,00%                                 | 11,83% | 1,10%                             | 0,45%  |                 |

| ID        | Set        | gamete<br>formaton<br>inhibition | ± SD   | total<br>sexual<br>forms<br>inhibition | ± SD   | %<br>rounding<br>up<br>inhibition | ± SD   | comments        |
|-----------|------------|----------------------------------|--------|----------------------------------------|--------|-----------------------------------|--------|-----------------|
| MMV007686 | Probe-like | 14,46%                           | 1,76%  | 22,13%                                 | 0,90%  | 2,94%                             | 2,17%  |                 |
| MMV007695 | Probe-like | -14,91%                          | 4,45%  | 1,78%                                  | 8,13%  | -1,62%                            | 1,88%  |                 |
| MMV007764 | Probe-like | 16,11%                           | 9,73%  | 16,73%                                 | 8,81%  | 4,65%                             | 5,82%  |                 |
| MMV007791 | Drug-like  | 19,67%                           | 13,24% | 25,42%                                 | 10,48% | 4,49%                             | 1,87%  |                 |
| MMV007808 | Drug-like  | -8,40%                           | 15,62% | 4,16%                                  | 15,52% | 1,50%                             | 0,14%  |                 |
| MMV007839 | Drug-like  | 39,12%                           | 61,37% | 42,23%                                 | 50,11% | 5,09%                             | 6,55%  |                 |
| MMV007875 | Drug-like  | 12,28%                           | 19,90% | 20,74%                                 | 15,37% | 2,45%                             | 4,48%  |                 |
| MMV007881 | Drug-like  | 0,11%                            | 0,87%  | 7,74%                                  | 8,39%  | -1,79%                            | 2,57%  |                 |
| MMV007906 | Drug-like  | 16,31%                           | 19,56% | 19,81%                                 | 18,77% | 0,72%                             | 4,01%  |                 |
| MMV007977 | Drug-like  | -3,10%                           | 2,19%  | 4,70%                                  | 4,55%  | -1,28%                            | 0,90%  |                 |
| MMV007978 | Drug-like  | -3,56%                           | 6,88%  | 0,57%                                  | 2,53%  | 2,90%                             | 2,32%  |                 |
| MMV008127 | Drug-like  | 3,95%                            | 3,43%  | 7,70%                                  | 2,09%  | 2,43%                             | 4,88%  |                 |
| MMV008138 | Drug-like  | 25,08%                           | 31,21% | 30,81%                                 | 23,93% | 3,88%                             | 0,59%  |                 |
| MMV008149 | Drug-like  | 10,47%                           | 5,95%  | 20,51%                                 | 9,52%  | 0,43%                             | 3,17%  |                 |
| MMV008160 | Probe-like | -3,50%                           | 13,42% | 2,80%                                  | 8,87%  | 0,76%                             | 2,93%  |                 |
| MMV008173 | Probe-like | -3,70%                           | 7,16%  | 7,66%                                  | 7,92%  | 2,07%                             | 0,77%  |                 |
| MMV008212 | Drug-like  | -2,15%                           | 4,97%  | 10,01%                                 | 6,55%  | 0,85%                             | 0,14%  |                 |
| MMV008270 | Drug-like  | 1,72%                            | 1,68%  | 7,83%                                  | 3,70%  | -0,06%                            | 3,65%  |                 |
| MMV008294 | Probe-like | -0,68%                           | 3,36%  | 6,21%                                  | 0,62%  | -0,50%                            | 2,20%  |                 |
| MMV008416 | Probe-like | 16,61%                           | 5,00%  | 25,10%                                 | 4,97%  | 1,29%                             | 1,78%  |                 |
| MMV008455 | Probe-like | -16,40%                          | 11,97% | -1,37%                                 | 12,05% | 0,48%                             | 0,71%  |                 |
| MMV008829 | Probe-like | 22,46%                           | 13,39% | 24,26%                                 | 12,47% | 2,36%                             | 5,00%  |                 |
| MMV008956 | Drug-like  | 10,86%                           | 9,28%  | 14,43%                                 | 8,68%  | 1,64%                             | 5,46%  |                 |
| MMV009015 | Probe-like | 7,46%                            | 11,76% | 16,62%                                 | 12,90% | 2,24%                             | 0,93%  |                 |
| MMV009060 | Drug-like  | 16,99%                           | 1,38%  | 23,02%                                 | 1,03%  | 4,55%                             | 3,06%  |                 |
| MMV009063 | Drug-like  | 24,73%                           | 2,03%  | 28,42%                                 | 0,63%  | 6,18%                             | 4,35%  |                 |
| MMV009085 | Probe-like | 16,84%                           | 7,52%  | 24,53%                                 | 7,18%  | 2,30%                             | 1,65%  |                 |
| MMV009108 | Drug-like  | 8,71%                            | 7,41%  | 16,17%                                 | 7,90%  | 4,28%                             | 0,93%  |                 |
| MMV009127 | Probe-like | 111,14%                          | 1,83%  | 104,70%                                | 0,68%  |                                   |        | autofluorescent |
| MMV011099 | Drug-like  | 11,29%                           | 3,14%  | 16,80%                                 | 1,04%  | -0,56%                            | 3,75%  |                 |
| MMV011256 | Drug-like  | 2,20%                            | 0,72%  | 8,15%                                  | 3,84%  | 0,07%                             | 2,49%  |                 |
| MMV011259 | Drug-like  | 12,21%                           | 10,46% | 15,68%                                 | 11,68% | 1,47%                             | 3,02%  |                 |
| MMV011436 | Probe-like | -3,28%                           | 1,67%  | 7,96%                                  | 1,15%  | 2,22%                             | 0,14%  |                 |
| MMV011438 | Probe-like | -2,56%                           | 0,70%  | 5,10%                                  | 4,97%  | -1,24%                            | 0,05%  |                 |
| MMV011522 | Probe-like | 18,97%                           | 6,25%  | 19,77%                                 | 1,92%  | 4,17%                             | 10,32% |                 |
| MMV011567 | Drug-like  | 7,18%                            | 18,60% | 15,61%                                 | 20,16% | 2,86%                             | 2,72%  |                 |
| MMV011576 | Drug-like  | -5,33%                           | 10,76% | 8,36%                                  | 9,58%  | -0,25%                            | 2,09%  |                 |
| MMV011832 | Probe-like | 15,71%                           | 1,97%  | 24,65%                                 | 0,66%  | 0,94%                             | 0,17%  |                 |
| MMV011895 | Probe-like | 18,63%                           | 9,26%  | 21,02%                                 | 8,51%  | 2,16%                             | 5,42%  |                 |
| MMV011944 | Drug-like  | 19,30%                           | 21,06% | 26,15%                                 | 18,84% | 2,71%                             | 1,13%  |                 |
| MMV018984 | Drug-like  | -1,16%                           | 16,22% | 10,82%                                 | 14,40% | 0,80%                             | 1,72%  |                 |
| MMV019017 | Drug-like  | 17,93%                           | 16,71% | 19,12%                                 | 12,98% | 3,82%                             | 8,51%  |                 |
| MMV019064 | Drug-like  | 1,51%                            | 13,21% | 11,17%                                 | 13,38% | 2,91%                             | 0,24%  |                 |
| MMV019066 | Drug-like  | -7,00%                           | 22,41% | 5,28%                                  | 20,11% | 1,55%                             | 1,23%  |                 |

| ID        | Set        | gamete<br>formaton<br>inhibition | ± SD   | total<br>sexual<br>forms<br>inhibition | ± SD   | %<br>rounding<br>up<br>inhibition | ± SD   | comments        |
|-----------|------------|----------------------------------|--------|----------------------------------------|--------|-----------------------------------|--------|-----------------|
| MMV019074 | Drug-like  | -17,64%                          | 6,50%  | -1,11%                                 | 9,57%  | -0,89%                            | 1,47%  |                 |
| MMV019110 | Drug-like  | 16,98%                           | 3,99%  | 19,78%                                 | 4,89%  | 1,92%                             | 4,02%  |                 |
| MMV019124 | Drug-like  | -1,81%                           | 2,21%  | 9,87%                                  | 2,68%  | 1,40%                             | 2,21%  |                 |
| MMV019127 | Drug-like  | 25,12%                           | 14,51% | 30,87%                                 | 11,30% | 3,32%                             | 1,62%  |                 |
| MMV019199 | Probe-like | 26,06%                           | 25,46% | 24,82%                                 | 21,82% | 6,13%                             | 7,92%  |                 |
| MMV019202 | Drug-like  | 1,96%                            | 1,47%  | 8,34%                                  | 3,17%  | -0,35%                            | 1,04%  |                 |
| MMV019241 | Probe-like | -0,66%                           | 4,80%  | 7,18%                                  | 0,44%  | -1,54%                            | 0,97%  |                 |
| MMV019258 | Drug-like  | 10,09%                           | 26,87% | 18,24%                                 | 24,55% | 2,82%                             | 0,25%  |                 |
| MMV019266 | Drug-like  | 40,13%                           | 35,07% | 36,54%                                 | 30,30% | 8,76%                             | 9,71%  |                 |
| MMV019313 | Drug-like  | -16,10%                          | 0,31%  | 0,20%                                  | 4,89%  | -0,86%                            | 2,41%  |                 |
| MMV019406 | Probe-like | 9,40%                            | 19,33% | 18,52%                                 | 16,92% | 2,01%                             | 1,81%  |                 |
| MMV019662 | Drug-like  | 28,82%                           | 28,76% | 32,68%                                 | 24,46% | 5,20%                             | 2,69%  |                 |
| MMV019670 | Drug-like  | 33,73%                           | 17,66% | 36,72%                                 | 10,22% | 6,08%                             | 4,97%  |                 |
| MMV019700 | Drug-like  | -2,98%                           | 12,34% | 7,81%                                  | 12,65% | 2,49%                             | 0,30%  |                 |
| MMV019738 | Drug-like  | 2,61%                            | 11,92% | 13,98%                                 | 11,17% | 0,72%                             | 1,30%  |                 |
| MMV019741 | Probe-like | 8,76%                            | 14,05% | 18,20%                                 | 12,78% | 1,76%                             | 1,48%  |                 |
| MMV019746 | Drug-like  | 7,46%                            | 4,54%  | 15,18%                                 | 7,00%  | 4,16%                             | 0,89%  |                 |
| MMV019762 | Drug-like  | 11,43%                           | 2,57%  | 13,15%                                 | 6,71%  | 3,79%                             | 0,69%  |                 |
| MMV019780 | Drug-like  | 26,55%                           | 10,29% | 32,16%                                 | 12,11% | 2,62%                             | 2,46%  |                 |
| MMV019871 | Drug-like  | 7,20%                            | 7,42%  | 12,45%                                 | 14,27% | -0,39%                            | 3,25%  |                 |
| MMV019881 | Probe-like | 41,52%                           | 4,72%  | 31,72%                                 | 6,69%  | 16,96%                            | 2,02%  |                 |
| MMV019995 | Probe-like | 4,96%                            | 22,25% | 14,23%                                 | 21,05% | 2,53%                             | 0,09%  |                 |
| MMV020243 | Probe-like | -3,73%                           | 9,53%  | 7,71%                                  | 10,16% | 1,95%                             | 0,44%  |                 |
| MMV020275 | Drug-like  | 3,55%                            | 0,23%  | 9,81%                                  | 3,08%  | -0,46%                            | 2,77%  |                 |
| MMV020403 | Probe-like | 5,86%                            | 7,36%  | 7,15%                                  | 9,43%  | 4,70%                             | 3,03%  |                 |
| MMV020439 | Drug-like  | 5,43%                            | 14,37% | 15,61%                                 | 13,98% | 1,47%                             | 0,36%  |                 |
| MMV020490 | Drug-like  | -8,63%                           | 5,88%  | 4,52%                                  | 8,49%  | 0,99%                             | 0,99%  |                 |
| MMV020492 | Drug-like  | 3,88%                            | 7,56%  | 9,31%                                  | 0,59%  | 0,71%                             | 0,99%  |                 |
| MMV020500 | Drug-like  | 45,90%                           | 27,39% | 46,13%                                 | 16,83% | 9,33%                             | 10,51% |                 |
| MMV020505 | Drug-like  | 30,93%                           | 6,73%  | 32,66%                                 | 0,10%  | 7,93%                             | 5,93%  |                 |
| MMV020548 | Drug-like  | -2,15%                           | 28,19% | 10,04%                                 | 24,50% | 0,63%                             | 1,34%  |                 |
| MMV020549 | Drug-like  | -10,61%                          | 6,36%  | 0,35%                                  | 6,79%  | 3,76%                             | 1,50%  |                 |
| MMV020651 | Drug-like  | 11,74%                           | 4,34%  | 13,09%                                 | 1,15%  | 4,46%                             | 2,44%  |                 |
| MMV020660 | Drug-like  | 4,01%                            | 6,03%  | 6,74%                                  | 9,62%  | 3,27%                             | 1,48%  |                 |
| MMV020700 | Drug-like  | -1,82%                           | 20,76% | 10,43%                                 | 19,19% | 0,47%                             | 0,40%  |                 |
| MMV020750 | Probe-like | -2,39%                           | 18,21% | 8,11%                                  | 15,41% | 2,82%                             | 2,74%  |                 |
| MMV020788 | Probe-like | 58,17%                           | 67,71% | 57,76%                                 | 55,85% | 12,69%                            | 16,08% | unconfirmed hit |
| MMV020885 | Probe-like | 19,55%                           | 19,19% | 20,69%                                 | 16,13% | 3,65%                             | 7,38%  |                 |
| MMV020912 | Probe-like | 21,76%                           | 14,66% | 29,69%                                 | 9,12%  | 1,15%                             | 1,37%  |                 |
| MMV020942 | Drug-like  | -16,17%                          | 9,84%  | -5,91%                                 | 1,73%  | -1,85%                            | 0,33%  |                 |
| MMV056726 | Drug-like  | -2,41%                           | 2,87%  | 6,63%                                  | 3,40%  | -2,76%                            | 0,42%  |                 |
| MMV073843 | Probe-like | 26,55%                           | 10,29% | 31,63%                                 | 10,03% | 3,67%                             | 0,82%  |                 |
| MMV075490 | Drug-like  | 0,98%                            | 0,64%  | 8,21%                                  | 4,55%  | -1,24%                            | 0,31%  |                 |
| MMV080034 | Probe-like | 28,12%                           | 34,64% | 32,91%                                 | 29,40% | 3,71%                             | 2,45%  |                 |

| ID        | Set        | gamete<br>formaton<br>inhibition | ± SD   | total<br>sexual<br>forms<br>inhibition | ± SD   | %<br>rounding<br>up<br>inhibition | ± SD  | comments |
|-----------|------------|----------------------------------|--------|----------------------------------------|--------|-----------------------------------|-------|----------|
| MMV084434 | Probe-like | 4,77%                            | 16,96% | 11,46%                                 | 6,41%  | -0,39%                            | 4,04% |          |
| MMV084940 | Drug-like  | 26,41%                           | 8,08%  | 29,44%                                 | 6,46%  | 6,85%                             | 2,02% |          |
| MMV085203 | Probe-like | 28,77%                           | 6,64%  | 34,63%                                 | 7,91%  | 1,88%                             | 0,91% |          |
| MMV085471 | Probe-like | 4,17%                            | 5,52%  | 9,80%                                  | 8,66%  | 0,01%                             | 1,71% |          |
| MMV085583 | Probe-like | 8,36%                            | 4,10%  | 12,62%                                 | 6,27%  | 1,17%                             | 2,86% |          |
| MMV086103 | Probe-like | 15,25%                           | 8,70%  | 16,85%                                 | 8,83%  | 3,52%                             | 4,60% |          |
| MMV128432 | Probe-like | -3,56%                           | 12,39% | 7,18%                                  | 14,26% | 2,53%                             | 1,43% |          |
| MMV142383 | Drug-like  | -5,93%                           | 14,96% | 5,87%                                  | 12,92% | 2,02%                             | 2,43% |          |
| MMV274073 | Drug-like  | 8,35%                            | 11,98% | 11,16%                                 | 11,51% | 2,78%                             | 5,16% |          |
| MMV396594 | Probe-like | -3,34%                           | 10,52% | 9,30%                                  | 11,08% | 0,46%                             | 0,15% |          |
| MMV396595 | Drug-like  | 48,24%                           | 42,04% | 50,19%                                 | 33,68% | 4,71%                             | 1,27% |          |
| MMV396632 | Drug-like  | -3,36%                           | 11,58% | 6,46%                                  | 11,91% | 3,66%                             | 0,58% |          |
| MMV396633 | Drug-like  | -5,94%                           | 5,48%  | 1,78%                                  | 0,12%  | -0,67%                            | 1,03% |          |
| MMV396635 | Probe-like | 8,82%                            | 4,43%  | 14,11%                                 | 1,38%  | 0,11%                             | 0,48% |          |
| MMV396652 | Probe-like | -8,98%                           | 3,71%  | -2,44%                                 | 0,87%  | 0,87%                             | 3,86% |          |
| MMV396663 | Probe-like | 3,10%                            | 13,28% | 14,19%                                 | 12,81% | 0,91%                             | 0,67% |          |
| MMV396664 | Probe-like | -13,41%                          | 2,84%  | 0,41%                                  | 6,36%  | 1,23%                             | 1,20% |          |
| MMV396665 | Probe-like | 0,92%                            | 4,77%  | 6,15%                                  | 0,09%  | 1,20%                             | 1,50% |          |
| MMV396669 | Drug-like  | 13,93%                           | 18,28% | 22,11%                                 | 12,15% | 2,77%                             | 1,14% |          |
| MMV396672 | Drug-like  | -4,74%                           | 22,56% | 7,27%                                  | 22,25% | 1,16%                             | 1,19% |          |
| MMV396679 | Probe-like | 46,73%                           | 16,06% | 48,01%                                 | 15,45% | 4,47%                             | 0,83% |          |
| MMV396680 | Probe-like | -15,91%                          | 3,03%  | 1,04%                                  | 4,58%  | -1,58%                            | 0,79% |          |
| MMV396681 | Drug-like  | -1,54%                           | 9,78%  | 9,53%                                  | 10,05% | 1,96%                             | 0,75% |          |
| MMV396693 | Probe-like | 1,38%                            | 5,25%  | 6,37%                                  | 10,34% | 1,00%                             | 0,16% |          |
| MMV396703 | Drug-like  | 0,15%                            | 11,00% | 6,61%                                  | 4,72%  | 0,15%                             | 0,54% |          |
| MMV396704 | Drug-like  | -3,87%                           | 20,05% | 8,87%                                  | 17,33% | 0,48%                             | 1,94% |          |
| MMV396705 | Drug-like  | 15,43%                           | 6,75%  | 17,06%                                 | 9,13%  | 3,40%                             | 2,05% |          |
| MMV396715 | Drug-like  | 43,24%                           | 7,84%  | 45,39%                                 | 8,23%  | 4,16%                             | 0,19% |          |
| MMV396717 | Probe-like | 0,34%                            | 13,31% | 12,33%                                 | 14,02% | 0,31%                             | 0,78% |          |
| MMV396719 | Drug-like  | 38,77%                           | 16,01% | 39,92%                                 | 11,39% | 7,64%                             | 1,48% |          |
| MMV396723 | Probe-like | 41,08%                           | 7,93%  | 40,71%                                 | 1,57%  | 9,40%                             | 6,15% |          |
| MMV396726 | Probe-like | -7,00%                           | 21,12% | 0,93%                                  | 11,20% | -0,11%                            | 1,59% |          |
| MMV396736 | Drug-like  | 19,85%                           | 0,17%  | 26,19%                                 | 1,49%  | 3,55%                             | 1,03% |          |
| MMV396744 | Drug-like  | 13,70%                           | 6,80%  | 21,81%                                 | 7,85%  | 2,39%                             | 0,04% |          |
| MMV396770 | Probe-like | 3,13%                            | 6,62%  | 14,26%                                 | 3,00%  | 1,11%                             | 0,04% |          |
| MMV403679 | Drug-like  | 19,06%                           | 12,63% | 23,28%                                 | 14,61% | 6,13%                             | 2,04% |          |
| MMV498479 | Probe-like | -7,32%                           | 18,47% | 5,68%                                  | 21,85% | 0,25%                             | 4,60% |          |
| MMV638723 | Probe-like | 9,13%                            | 4,27%  | 18,21%                                 | 0,59%  | 2,31%                             | 2,26% |          |
| MMV645672 | Probe-like | 0,63%                            | 5,17%  | 13,89%                                 | 6,35%  | -1,11%                            | 0,37% |          |
| MMV665783 | Probe-like | 16,36%                           | 9,19%  | 18,81%                                 | 2,09%  | 2,90%                             | 2,18% |          |
| MMV665785 | Probe-like | 8,66%                            | 8,74%  | 10,01%                                 | 8,17%  | 4,47%                             | 5,70% |          |
| MMV665786 | Probe-like | -10,81%                          | 11,55% | 1,33%                                  | 13,35% | 2,38%                             | 0,95% |          |
| MMV665789 | Drug-like  | 19,28%                           | 17,07% | 28,26%                                 | 11,14% | 0,31%                             | 1,07% |          |
| MMV665794 | Probe-like | 26,25%                           | 1,81%  | 25,33%                                 | 2,01%  | 5,89%                             | 0,35% |          |



| ID        | Set        | gamete<br>formaton<br>inhibition | ± SD   | total<br>sexual<br>forms<br>inhibition | ± SD   | %<br>rounding<br>up<br>inhibition | ± SD   | comments        |
|-----------|------------|----------------------------------|--------|----------------------------------------|--------|-----------------------------------|--------|-----------------|
| MMV665796 | Drug-like  | 13,04%                           | 16,04% | 14,14%                                 | 18,84% | 3,85%                             | 0,86%  |                 |
| MMV665797 | Probe-like | 3,85%                            | 4,48%  | 14,27%                                 | 7,40%  | 1,58%                             | 1,51%  |                 |
| MMV665798 | Drug-like  | 5,73%                            | 14,67% | 12,05%                                 | 8,84%  | -0,32%                            | 1,16%  |                 |
| MMV665800 | Drug-like  | 1,92%                            | 2,84%  | 10,87%                                 | 7,10%  | 3,70%                             | 2,48%  |                 |
| MMV665803 | Drug-like  | 12,59%                           | 26,69% | 18,71%                                 | 23,54% | 5,10%                             | 1,89%  |                 |
| MMV665805 | Drug-like  | 49,55%                           | 29,45% | 47,85%                                 | 19,25% | 12,45%                            | 11,02% |                 |
| MMV665806 | Drug-like  | 8,97%                            | 6,02%  | 19,25%                                 | 7,24%  | 0,65%                             | 0,01%  |                 |
| MMV665807 | Drug-like  | -11,73%                          | 21,19% | -0,42%                                 | 11,08% | -3,11%                            | 1,14%  |                 |
| MMV665809 | Probe-like | 3,24%                            | 4,05%  | 14,45%                                 | 3,80%  | 0,88%                             | 2,44%  |                 |
| MMV665810 | Probe-like | 4,54%                            | 11,19% | 8,91%                                  | 10,52% | 1,44%                             | 5,49%  |                 |
| MMV665812 | Probe-like | -9,40%                           | 15,74% | 4,00%                                  | 13,45% | 0,93%                             | 2,46%  |                 |
| MMV665813 | Probe-like | -11,05%                          | 19,11% | 2,80%                                  | 17,27% | 0,67%                             | 1,28%  |                 |
| MMV665814 | Probe-like | 37,26%                           | 8,10%  | 32,04%                                 | 1,72%  | 11,40%                            | 3,94%  |                 |
| MMV665817 | Drug-like  | -6,67%                           | 10,85% | 3,59%                                  | 11,20% | 3,77%                             | 0,76%  |                 |
| MMV665820 | Drug-like  | -12,29%                          | 7,71%  | 2,56%                                  | 11,08% | -0,25%                            | 2,19%  |                 |
| MMV665824 | Probe-like | 3,41%                            | 18,52% | 13,63%                                 | 15,02% | 2,05%                             | 3,39%  |                 |
| MMV665826 | Drug-like  | 32,39%                           | 12,56% | 28,51%                                 | 12,42% | 9,07%                             | 4,49%  |                 |
| MMV665827 | Probe-like | -1,87%                           | 4,06%  | 11,26%                                 | 5,48%  | -0,34%                            | 0,44%  |                 |
| MMV665831 | Probe-like | -9,14%                           | 16,98% | 1,64%                                  | 9,42%  | -3,15%                            | 0,82%  |                 |
| MMV665836 | Probe-like | -7,05%                           | 4,53%  | 2,48%                                  | 9,67%  | -2,87%                            | 0,08%  |                 |
| MMV665840 | Probe-like | 14,74%                           | 5,85%  | 21,19%                                 | 6,97%  | 4,36%                             | 0,29%  |                 |
| MMV665841 | Probe-like | 22,93%                           | 14,98% | 26,10%                                 | 13,05% | 0,44%                             | 5,89%  |                 |
| MMV665843 | Drug-like  | 11,17%                           | 4,97%  | 20,71%                                 | 7,47%  | 1,04%                             | 1,48%  |                 |
| MMV665850 | Drug-like  | 26,67%                           | 10,77% | 33,18%                                 | 4,52%  | 1,96%                             | 3,86%  |                 |
| MMV665852 | Probe-like | 16,57%                           | 2,94%  | 22,45%                                 | 3,46%  | 4,80%                             | 4,13%  |                 |
| MMV665857 | Drug-like  | 12,79%                           | 30,26% | 20,26%                                 | 25,06% | 3,55%                             | 3,39%  |                 |
| MMV665864 | Probe-like | 30,84%                           | 29,50% | 20,81%                                 | 15,80% | 23,59%                            | 17,75% |                 |
| MMV665874 | Drug-like  | -3,97%                           | 9,11%  | 3,95%                                  | 0,55%  | -1,01%                            | 1,89%  |                 |
| MMV665875 | Probe-like | 27,15%                           | 4,79%  | 27,56%                                 | 7,80%  | 3,71%                             | 0,53%  |                 |
| MMV665876 | Drug-like  | 0,56%                            | 5,10%  | 4,52%                                  | 3,16%  | 2,58%                             | 4,51%  |                 |
| MMV665879 | Drug-like  | 2,65%                            | 10,03% | 8,64%                                  | 4,80%  | 0,31%                             | 1,43%  |                 |
| MMV665881 | Probe-like | -2,49%                           | 0,33%  | 3,13%                                  | 2,19%  | 1,03%                             | 4,18%  |                 |
| MMV665882 | Probe-like | 18,15%                           | 0,27%  | 25,98%                                 | 3,20%  | 1,83%                             | 1,84%  |                 |
| MMV665883 | Drug-like  | 38,14%                           | 20,99% | 41,54%                                 | 17,01% | 3,61%                             | 3,87%  |                 |
| MMV665886 | Probe-like | 14,66%                           | 17,96% | 17,39%                                 | 17,22% | 1,99%                             | 4,48%  |                 |
| MMV665888 | Drug-like  | 4,71%                            | 11,79% | 8,06%                                  | 12,11% | 2,51%                             | 4,39%  |                 |
| MMV665890 | Drug-like  | 26,06%                           | 17,12% | 29,16%                                 | 14,89% | 6,79%                             | 2,86%  |                 |
| MMV665891 | Drug-like  | 50,61%                           | 64,39% | 48,10%                                 | 56,30% | 8,40%                             | 13,85% | unconfirmed hit |
| MMV665894 | Probe-like | 12,12%                           | 7,21%  | 14,24%                                 | 5,76%  | 3,29%                             | 6,74%  |                 |
| MMV665897 | Drug-like  | -6,18%                           | 13,51% | 6,05%                                  | 12,50% | 1,56%                             | 1,51%  |                 |
| MMV665898 | Probe-like | 25,40%                           | 10,93% | 24,82%                                 | 9,69%  | 5,29%                             | 5,91%  |                 |
| MMV665899 | Drug-like  | -9,52%                           | 2,12%  | -2,16%                                 | 8,08%  | -0,14%                            | 0,01%  |                 |
| MMV665901 | Drug-like  | 12,47%                           | 4,36%  | 20,80%                                 | 3,95%  | 2,48%                             | 3,38%  |                 |
| MMV665902 | Drug-like  | 13,64%                           | 14,33% | 18,14%                                 | 7,70%  | 0,89%                             | 0,62%  |                 |

| ID        | Set        | gamete<br>formaton<br>inhibition | ± SD   | total<br>sexual<br>forms<br>inhibition | ± SD   | %<br>rounding<br>up<br>inhibition | ± SD   | comments        |
|-----------|------------|----------------------------------|--------|----------------------------------------|--------|-----------------------------------|--------|-----------------|
| MMV665904 | Drug-like  | 21,30%                           | 11,38% | 21,86%                                 | 9,70%  | 4,22%                             | 6,46%  |                 |
| MMV665906 | Drug-like  | 1,40%                            | 12,84% | 11,58%                                 | 12,79% | 2,35%                             | 0,49%  |                 |
| MMV665908 | Probe-like | 15,64%                           | 14,77% | 24,15%                                 | 9,93%  | 1,79%                             | 0,15%  |                 |
| MMV665909 | Drug-like  | 57,89%                           | 2,42%  | 45,75%                                 | 0,22%  | 22,25%                            | 0,50%  | unconfirmed hit |
| MMV665914 | Drug-like  | 0,20%                            | 0,62%  | 11,10%                                 | 3,24%  | 1,89%                             | 0,19%  |                 |
| MMV665915 | Drug-like  | 16,50%                           | 1,29%  | 26,13%                                 | 1,57%  | -0,24%                            | 0,73%  |                 |
| MMV665916 | Drug-like  | 54,90%                           | 72,66% | 50,39%                                 | 65,59% | 17,98%                            | 22,98% | unconfirmed hit |
| MMV665917 | Drug-like  | -1,02%                           | 11,38% | 10,93%                                 | 10,36% | 0,85%                             | 1,81%  |                 |
| MMV665918 | Drug-like  | 9,94%                            | 9,45%  | 12,40%                                 | 10,16% | 3,01%                             | 4,03%  |                 |
| MMV665923 | Probe-like | 35,42%                           | 23,15% | 37,87%                                 | 16,62% | 6,62%                             | 2,61%  |                 |
| MMV665924 | Probe-like | 18,54%                           | 10,79% | 18,48%                                 | 7,72%  | 5,31%                             | 8,33%  |                 |
| MMV665927 | Probe-like | -7,97%                           | 9,08%  | 1,12%                                  | 2,52%  | -1,75%                            | 0,62%  |                 |
| MMV665928 | Drug-like  | 0,42%                            | 10,36% | 10,14%                                 | 10,25% | 3,14%                             | 1,16%  |                 |
| MMV665929 | Drug-like  | -3,90%                           | 3,59%  | 8,93%                                  | 4,19%  | 0,48%                             | 1,59%  |                 |
| MMV665934 | Probe-like | 12,15%                           | 20,60% | 20,46%                                 | 16,65% | 2,61%                             | 3,60%  |                 |
| MMV665935 | Drug-like  | 29,25%                           | 11,07% | 34,78%                                 | 6,95%  | 2,72%                             | 0,69%  |                 |
| MMV665936 | Probe-like | -0,65%                           | 14,97% | 9,72%                                  | 13,67% | 2,59%                             | 1,61%  |                 |
| MMV665939 | Drug-like  | 3,89%                            | 6,45%  | 9,94%                                  | 0,31%  | -0,06%                            | 0,90%  |                 |
| MMV665940 | Drug-like  | -7,38%                           | 17,28% | 6,50%                                  | 17,33% | -0,28%                            | 0,70%  |                 |
| MMV665943 | Probe-like | 4,07%                            | 6,75%  | 14,12%                                 | 9,02%  | 1,95%                             | 1,17%  |                 |
| MMV665944 | Probe-like | 19,26%                           | 1,52%  | 27,64%                                 | 4,21%  | 0,74%                             | 1,31%  |                 |
| MMV665946 | Drug-like  | -8,28%                           | 13,38% | 4,55%                                  | 13,56% | 1,22%                             | 0,23%  |                 |
| MMV665948 | Drug-like  | 3,50%                            | 18,65% | 14,51%                                 | 16,60% | 0,92%                             | 1,41%  |                 |
| MMV665949 | Probe-like | 16,15%                           | 1,52%  | 14,60%                                 | 0,68%  | 7,28%                             | 6,38%  |                 |
| MMV665953 | Drug-like  | 1,41%                            | 2,78%  | 10,12%                                 | 6,38%  | 4,10%                             | 1,65%  |                 |
| MMV665954 | Drug-like  | 7,49%                            | 9,40%  | 16,44%                                 | 9,80%  | 2,63%                             | 0,52%  |                 |
| MMV665961 | Drug-like  | 31,60%                           | 2,27%  | 33,02%                                 | 0,06%  | 8,18%                             | 0,09%  |                 |
| MMV665971 | Probe-like | -1,50%                           | 4,57%  | 11,30%                                 | 7,71%  | -0,13%                            | 1,73%  |                 |
| MMV665972 | Probe-like | -0,96%                           | 15,41% | 9,26%                                  | 15,37% | 2,69%                             | 0,10%  |                 |
| MMV665977 | Probe-like | 11,30%                           | 13,04% | 19,01%                                 | 10,58% | 3,53%                             | 3,39%  |                 |
| MMV665979 | Drug-like  | 10,81%                           | 7,53%  | 16,41%                                 | 8,08%  | 6,14%                             | 0,95%  |                 |
| MMV665987 | Probe-like | 3,25%                            | 7,13%  | 13,84%                                 | 7,12%  | 1,59%                             | 1,50%  |                 |
| MMV665994 | Probe-like | 3,47%                            | 8,20%  | 10,19%                                 | 11,70% | -1,31%                            | 0,82%  |                 |
| MMV666009 | Drug-like  | -4,16%                           | 16,58% | 7,41%                                  | 17,27% | 1,66%                             | 1,04%  |                 |
| MMV666020 | Probe-like | 6,54%                            | 4,55%  | 16,09%                                 | 4,12%  | 2,20%                             | 2,56%  |                 |
| MMV666021 | Probe-like | 11,22%                           | 17,53% | 20,35%                                 | 13,98% | 1,74%                             | 3,62%  |                 |
| MMV666022 | Probe-like | 8,40%                            | 3,46%  | 16,13%                                 | 2,83%  | 4,07%                             | 3,04%  |                 |
| MMV666023 | Probe-like | 56,53%                           | 13,71% | 42,48%                                 | 16,67% | 24,92%                            | 4,60%  |                 |
| MMV666025 | Probe-like | -5,35%                           | 5,74%  | 0,76%                                  | 1,17%  | 0,97%                             | 0,35%  |                 |
| MMV666026 | Probe-like | 28,37%                           | 14,03% | 27,22%                                 | 10,28% | 5,89%                             | 9,00%  |                 |
| MMV666054 | Probe-like | 12,63%                           | 11,41% | 18,09%                                 | 10,29% | 6,02%                             | 2,27%  |                 |
| MMV666057 | Drug-like  | 27,38%                           | 10,22% | 32,22%                                 | 7,04%  | 4,14%                             | 0,48%  |                 |
| MMV666060 | Probe-like | -3,27%                           | 10,17% | 9,28%                                  | 13,22% | 0,35%                             | 2,70%  |                 |
| MMV666061 | Drug-like  | 4,94%                            | 0,10%  | 14,77%                                 | 1,75%  | 2,21%                             | 0,96%  |                 |

| ID        | Set        | gamete<br>formaton<br>inhibition | ± SD   | total<br>sexual<br>forms<br>inhibition | ± SD   | %<br>rounding<br>up<br>inhibition | ± SD  | comments        |
|-----------|------------|----------------------------------|--------|----------------------------------------|--------|-----------------------------------|-------|-----------------|
| MMV666062 | Probe-like | -5,35%                           | 6,14%  | 9,34%                                  | 9,62%  | -1,57%                            | 2,46% |                 |
| MMV666067 | Drug-like  | 2,95%                            | 0,62%  | 8,57%                                  | 8,01%  | 0,14%                             | 3,70% |                 |
| MMV666069 | Drug-like  | 8,84%                            | 2,33%  | 18,30%                                 | 5,06%  | 1,77%                             | 1,01% |                 |
| MMV666070 | Drug-like  | 18,71%                           | 21,17% | 25,38%                                 | 15,72% | 3,70%                             | 0,06% |                 |
| MMV666071 | Drug-like  | 16,71%                           | 11,05% | 24,80%                                 | 11,40% | 1,64%                             | 0,19% |                 |
| MMV666072 | Drug-like  | -3,86%                           | 4,30%  | 6,43%                                  | 3,49%  | 3,36%                             | 3,10% |                 |
| MMV666075 | Drug-like  | 4,73%                            | 1,36%  | 11,28%                                 | 7,17%  | -1,11%                            | 1,02% |                 |
| MMV666079 | Probe-like | 25,43%                           | 15,49% | 29,83%                                 | 14,17% | 4,89%                             | 1,42% |                 |
| MMV666080 | Drug-like  | 14,75%                           | 1,13%  | 22,79%                                 | 1,88%  | 2,37%                             | 0,82% |                 |
| MMV666081 | Drug-like  | 20,19%                           | 20,83% | 21,94%                                 | 19,14% | 2,58%                             | 5,22% |                 |
| MMV666093 | Drug-like  | 7,26%                            | 14,11% | 15,92%                                 | 14,24% | 2,93%                             | 0,07% |                 |
| MMV666095 | Probe-like | -2,51%                           | 27,67% | 9,55%                                  | 24,48% | 0,81%                             | 0,91% |                 |
| MMV666101 | Probe-like | 1,57%                            | 3,13%  | 12,51%                                 | 1,06%  | 1,61%                             | 1,34% |                 |
| MMV666102 | Drug-like  | 13,52%                           | 10,92% | 22,99%                                 | 12,36% | 0,41%                             | 1,71% |                 |
| MMV666103 | Drug-like  | 92,32%                           | 18,12% | 86,46%                                 | 15,44% | 7,35%                             | 3,42% | unconfirmed hit |
| MMV666105 | Drug-like  | 7,17%                            | 18,36% | 14,65%                                 | 17,46% | 4,38%                             | 0,63% |                 |
| MMV666106 | Probe-like | -4,18%                           | 17,65% | 7,56%                                  | 15,30% | 1,73%                             | 2,20% |                 |
| MMV666108 | Drug-like  | 3,61%                            | 26,48% | 14,41%                                 | 24,32% | 0,87%                             | 0,21% |                 |
| MMV666109 | Probe-like | 29,07%                           | 18,55% | 34,66%                                 | 13,14% | 2,86%                             | 0,78% |                 |
| MMV666110 | Drug-like  | -1,06%                           | 0,60%  | 8,45%                                  | 1,51%  | 3,74%                             | 1,83% |                 |
| MMV666116 | Drug-like  | 36,66%                           | 30,82% | 41,01%                                 | 24,06% | 3,02%                             | 0,08% |                 |
| MMV666123 | Probe-like | 12,61%                           | 15,24% | 15,21%                                 | 12,74% | 2,60%                             | 7,09% |                 |
| MMV666124 | Probe-like | 8,01%                            | 1,22%  | 14,34%                                 | 4,82%  | -1,24%                            | 1,41% |                 |
| MMV666125 | Probe-like | 14,99%                           | 22,28% | 16,35%                                 | 20,88% | 3,61%                             | 5,10% |                 |
| MMV666596 | Probe-like | -5,87%                           | 23,56% | 5,66%                                  | 10,73% | -4,05%                            | 4,33% |                 |
| MMV666599 | Drug-like  | 5,98%                            | 3,49%  | 11,02%                                 | 1,37%  | 0,75%                             | 0,78% |                 |
| MMV666600 | Probe-like | 1,56%                            | 1,02%  | 11,04%                                 | 3,15%  | 3,28%                             | 0,30% |                 |
| MMV666601 | Probe-like | 14,61%                           | 0,68%  | 21,58%                                 | 1,66%  | 3,82%                             | 0,01% |                 |
| MMV666604 | Probe-like | -2,96%                           | 5,35%  | 10,44%                                 | 7,17%  | -0,47%                            | 0,30% |                 |
| MMV666607 | Probe-like | 45,87%                           | 4,65%  | 46,61%                                 | 0,92%  | 6,36%                             | 2,97% |                 |
| MMV666686 | Probe-like | 3,22%                            | 23,95% | 13,27%                                 | 21,88% | 1,99%                             | 0,53% |                 |
| MMV666687 | Probe-like | -2,03%                           | 23,09% | 3,81%                                  | 16,46% | 1,45%                             | 1,61% |                 |
| MMV666688 | Probe-like | -5,20%                           | 14,45% | 8,23%                                  | 12,41% | 0,02%                             | 2,31% |                 |
| MMV666689 | Probe-like | 14,78%                           | 7,88%  | 20,06%                                 | 4,67%  | 6,05%                             | 0,21% |                 |
| MMV666691 | Probe-like | 12,22%                           | 2,58%  | 15,62%                                 | 4,61%  | 1,77%                             | 3,03% |                 |
| MMV666692 | Probe-like | -1,13%                           | 0,60%  | 10,12%                                 | 2,86%  | 1,76%                             | 0,88% |                 |
| MMV666693 | Drug-like  | -6,21%                           | 15,77% | 1,50%                                  | 5,25%  | -0,19%                            | 2,95% |                 |
| MMV667486 | Probe-like | 39,80%                           | 25,09% | 43,39%                                 | 21,29% | 2,54%                             | 2,06% |                 |
| MMV667487 | Drug-like  | -3,83%                           | 4,78%  | 8,44%                                  | 7,01%  | 1,05%                             | 0,51% |                 |
| MMV667488 | Probe-like | 1,44%                            | 8,82%  | 7,58%                                  | 12,21% | -0,36%                            | 1,14% |                 |
| MMV667489 | Probe-like | -14,91%                          | 7,69%  | -5,82%                                 | 0,06%  | -0,90%                            | 0,19% |                 |
| MMV667490 | Probe-like | 4,73%                            | 8,75%  | 11,45%                                 | 3,01%  | -0,86%                            | 0,54% |                 |
| MMV667492 | Probe-like | 5,27%                            | 2,85%  | 11,60%                                 | 2,34%  | -0,82%                            | 6,30% |                 |
